# Supplementary material
Source: bioRxiv or medRxiv preprint supplement (http://biorxiv.org/highwire/filestream/133573/field_highwire_adjunct_files/10/319723-8.pdf)
Supplement: Supplementary file [file 319723-8.pdf]

*Burkholderia* sp. RPE67

*Burkholderia* sp. YI23

*Burkholderia* sp. RPE64

*Burkholderia pseudomallei* MSHR146  
*Burkholderia pseudomallei* NAU20B-16  
*Burkholderia pseudomallei* MSHR511  
*Burkholderia pseudomallei* MSHR5855  
*Burkholderia pseudomallei* MSHR5848  
*Burkholderia pseudomallei* strain MSHR668  
*Burkholderia pseudomallei* 668  
*Burkholderia pseudomallei* K42  
*Burkholderia pseudomallei* NCTC 13178  
*Burkholderia pseudomallei* TSV 48  
*Burkholderia pseudomallei* strain Bp1651  
*Burkholderia pseudomallei* MSHR62  
*Burkholderia pseudomallei* NCTC 13179  
*Burkholderia* sp. TSV202  
*Burkholderia pseudomallei* strain BDP  
*Burkholderia pseudomallei* MSHR520  
*Burkholderia pseudomallei* MSHR305  
*Burkholderia pseudomallei* MSHR2543  
*Burkholderia pseudomallei* A79A  
*Burkholderia pseudomallei* B03  
*Burkholderia pseudomallei* PB08298010  
*Burkholderia pseudomallei* strain vgh07  
*Burkholderia pseudomallei* strain 982  
*Burkholderia pseudomallei* strain MS  
*Burkholderia pseudomallei* strain M1  
*Burkholderia pseudomallei* K96243  
*Burkholderia pseudomallei* strain K96243  
*Burkholderia pseudomallei* 1026b  
*Burkholderia pseudomallei* 1026b 2  
*Burkholderia pseudomallei* strain BGR  
*Burkholderia pseudomallei* 406e  
*Burkholderia pseudomallei* strain BSR  
*Burkholderia pseudomallei* MSHR5858  
*Burkholderia pseudomallei* HBPUB10303a  
*Burkholderia pseudomallei* 1106a  
*Burkholderia pseudomallei* strain Mahidol-1106a  
*Burkholderia pseudomallei* strain 1106a  
*Burkholderia pseudomallei* BPC006  
*Burkholderia pseudomallei* 7894  
*Burkholderia pseudomallei* HBPUB10134a  
*Burkholderia pseudomallei* strain PHLS 112  
*Burkholderia pseudomallei* strain vgh16R  
*Burkholderia pseudomallei* strain vgh16W  
*Burkholderia pseudomallei* strain MSHR1655  
*Burkholderia pseudomallei* Pasteur 52237  
*Burkholderia pseudomallei* genome assembly BP 3921g  
*Burkholderia pseudomallei* 1710b  
*Burkholderia pseudomallei* 576  
*Burkholderia mallei* strain 2002734306  
*Burkholderia mallei* strain 6  
*Burkholderia mallei* NCTC 10229  
*Burkholderia mallei* NCTC 10247  
*Burkholderia mallei* strain 2002734299  
*Burkholderia mallei* NCTC 10247 2  
*Burkholderia mallei* strain 11  
*Burkholderia mallei* strain FMH 23344  
*Burkholderia mallei* ATCC 23344  
*Burkholderia mallei* SAVP1  
*Burkholderia mallei* strain 2002721276  
*Burkholderia mallei* strain 23344  
*Burkholderia mallei* strain BMQ  
*Burkholderia mallei* strain 2000031063  
*Burkholderia mallei* strain India86-567-2  
*Burkholderia oklahomensis* C6786  
*Burkholderia oklahomensis* strain EO147  
*Burkholderia gladioli* strain ATCC 10248  
*Burkholderia gladioli* BSR3  
*Burkholderia cenocepacia* strain DDS 22E-1  
*Burkholderia multivorans* ATCC BAA-247  
*Burkholderia multivorans* ATCC 17616  
*Burkholderia multivorans* ATCC 17616 2  
*Burkholderia vietnamiensis* LMG 10929  
*Burkholderia* sp. KJ006  
*Burkholderia vietnamiensis* G4  
*Burkholderia cepacia* ATCC 25416  
*Burkholderia* sp. 383  
*Burkholderia cepacia* JBK9  
*Burkholderia glumae* LMG 2196  
*Burkholderia glumae* BGR1  
*Burkholderia cenocepacia* MC0-3  
*Burkholderia cenocepacia* strain 895  
*Burkholderia cenocepacia* strain ST32  
*Burkholderia cepacia* strain DDS 7H-2  
*Burkholderia cenocepacia* J2315  
*Burkholderia cenocepacia* H111  
*Burkholderia cenocepacia* strain 842  
*Burkholderia pseudomallei* NAU35A-3  
*Burkholderia pseudomallei* MSHR491  
*Burkholderia pseudomallei* MSHR840
